# Supplementary material for: The molecular basis for sarcomere organization in vertebrate skeletal muscle
Source: PubMed Central journal article supplement (PMC8054911; doi:10.1016/j.cell.2021.02.047), 2021-04-15
Supplement: mmc1.pdf [file mmc1.pdf]

**Cell, Volume 184**

**Supplemental information**

**The molecular basis for sarcomere organization  
in vertebrate skeletal muscle**

**Zhexin Wang, Michael Grange, Thorsten Wagner, Ay Lin Kho, Mathias Gautel, and Stefan Raunser**

|                           | <b>Ion beam voltage</b> | <b>Ion beam current</b> | <b>Thickness of lamella</b> |
|---------------------------|-------------------------|-------------------------|-----------------------------|
| <b>Step 1</b>             | 30 kV                   | 500 pA                  | 3 $\mu$ m                   |
| <b>Step 2</b>             | 30 kV                   | 300 pA                  | 1 $\mu$ m                   |
| <b>Step 3</b>             | 30 kV                   | 100 pA                  | 500 nm                      |
| <b>Step 4 (polishing)</b> | 30 kV                   | 50 pA                   | 30-150 nm                   |

**Table S1. Milling strategy during lamellae production. Related to [Figure S1](#) and [STAR Methods](#)**

| <b>Parameter</b>                                | Actomyosin complex (EMDB-12289) | re-centered myosin double-head (EMDB-12291) | I-band thin filament (without troponin) (EMDB-12292) | I-band thin filament (with troponin) (EMDB-12293) |
|-------------------------------------------------|---------------------------------|---------------------------------------------|------------------------------------------------------|---------------------------------------------------|
| <b>Data collection and processing</b>           |                                 |                                             |                                                      |                                                   |
| Magnification                                   | 81000                           | 81000                                       | 81000                                                | 81000                                             |
| Voltage (kV)                                    | 300                             | 300                                         | 300                                                  | 300                                               |
| Exposure dose (e <sup>-</sup> /Å <sup>2</sup> ) | 130-155                         | 130-155                                     | 130-155                                              | 130-155                                           |
| Defocus range ( $\mu$ m)                        | 2.4-3.4                         | 2.4-3.4                                     | 3.3-4                                                | 3.3-4                                             |
| Pixel size (Å)                                  | 1.76                            | 1.76                                        | 1.76                                                 | 1.76                                              |
| No. of tomograms                                | 8                               | 8                                           | 4                                                    | 4                                                 |
| Initial no. of particles                        | 32,421                          | 32,421                                      | 15,153                                               | 704                                               |
| Final no. of particles                          | 18,090                          | 4,519                                       | 15,153                                               | 704                                               |
| Symmetry imposed                                | C1                              | C1                                          | Helical (-166.6° twist, 27.9 Å rise)                 | C1                                                |
| FSC threshold                                   | 0.143                           | 0.143                                       | 0.143                                                | 0.143                                             |
| Map resolution (Å)                              | 10.2                            | 15.1                                        | 10.6                                                 | 19.8                                              |

**Table S2. Cryo-ET data collection and sub-tomogram averaging statistics. Related to [STAR Methods](#)**

| <b>Score</b> | <b>R</b> | <b>G</b> | <b>B</b> | <b>E</b> |
|--------------|----------|----------|----------|----------|
| <b>R</b>     | 10       | -1       | -1       | -1       |
| <b>G</b>     | -1       | 0        | -1       | -1       |
| <b>B</b>     | -1       | -1       | 0        | -1       |
| <b>E</b>     | -1       | -1       | -1       | 0        |

**Table S3. Weight matrix used for multiple sequence alignment with MUSCLE algorithm. Related to [Figure S5](#) and [STAR Methods](#)**
